# Development of the Korean primary care assessment tool—measuring user experience: tests of data quality and measurement performance

JAE HO LEE<sup>1</sup>, YONG-JUN CHOI<sup>2</sup>, NAK JIN SUNG<sup>3</sup>, SOO YOUNG KIM<sup>4</sup>, SEOL HEE CHUNG<sup>5</sup>, JAIYONG KIM<sup>2</sup>, TAE-HEE JEON<sup>6</sup> AND HOON KI PARK<sup>7</sup> FOR THE KOREAN PRIMARY CARE RESEARCH GROUP

<sup>1</sup>Family Medicine, The Catholic University of Korea, 505 Banpo-dong, Seocho-gu, Seoul 137-701, <sup>2</sup>Social and Preventive Medicine, Hallym University, 39 Hallymdaehak-gil, Chuncheon, Gangwon-Do, <sup>3</sup>Family Medicine, Dongguk University, Ilsan, <sup>4</sup>Family Medicine, Hallym University, Seoul 137-701, <sup>5</sup>Research Department, Health Insurance Review and Assessment Service, Seoul, <sup>6</sup>Family Medicine, Seoul Veterans Hospital, Seoul, and <sup>7</sup>Family Medicine, Hanyang University, Seoul, Korea

## Abstract

**Objectives.** To develop a tool for assessing the performance of primary care services in South Korea from the patient's perspective and to test the validity of the tool under the conceptual framework of the recently developed definition of primary care in Korea.

**Design.** Item development for questionnaire and a cross-sectional survey for tool validation at 16 primary care clinics. All family physicians included in this study were required to have practiced at their current clinic for at least 2 years.

**Participants.** A nine expert panel was assembled for tool development and patients (or guardians) who had visited their primary care clinic on six or more occasions over a period of more than 6 months participated in the survey.

**Main outcome measures.** Scores corresponding to each domain of primary care.

**Results.** A total of 722 effective data sets were used for the analysis. Five items were eliminated from the preliminary 30-item tool after expert discussions at two seminars. Another four items were eliminated by principle component analysis. For each of the four domains (comprehensiveness, coordination function, personalized care, and family/community orientation), tests of scaling assumptions were well satisfied by all Likert-scaled measures. On the other hand, 'first contact' turned out to be a composite domain with five independent single-item scales.

**Conclusion.** The Korean primary care assessment tool (version 1) consists of four multi-item scales and one composite scale. Widespread application of this tool will provide an empirical basis for the measurement, monitoring and continuous improvement of primary care in South Korea.

**Keywords:** family medicine, health policy, Korea, primary care/general practice, public health, quality management, quality measurement, setting of care, surveys

## Introduction

The body of evidence supporting the health-promoting and disease-preventing influence of primary care has been growing since researchers began to distinguish primary care from other aspects of the health service delivery system. The evidence also shows that primary care in contrast to specialty care is associated with a more equitable distribution of health

throughout the population, and this finding has held true in both national and cross-national studies [1]. The term primary care, as distinguished from primary health care, is generally reserved for clinical activity that is primarily focussed on the individual. It also connotes conventional primary medical care striving to achieve the goals of primary health care [2]. In some health systems, primary care sits at the center of a complex primary health care system, which coordinates a wide

Address reprint requests to: Jae Ho Lee, Family Medicine, The Catholic University of Korea, 505 Banpo-dong, Seocho-gu, Seoul 137-701, Korea. Tel: +82-10-6778-7808; Fax: +82-2-590-2968; E-mail: jaeholee@catholic.ac.kr

range of nursing home and home care services. However, in other systems, primary care has little formal connection with any other primary health care activity. This diversity of opinion regarding the purpose and practice of primary care has made it difficult to adopt a universal definition of primary care [3].

The US Institute of Medicine defined primary care as the provision of integrated, accessible health care services by clinicians who are accountable for addressing a large majority of personal health care needs, developing a sustained partnership with patients and practicing in the context of family and community. It also encouraged the development of appropriate tools for assessing the performance of primary care practices [4]. This publication on the concept of primary care led to the development and implementation of at least three primary care performance measures, including the Component of Primary Care Index [5], Primary Care Assessment Survey (PCAS) [6] and primary care assessment tool (PCAT) [7, 8]. The PCAS influenced the development of the General Practice Assessment Survey (GPAS) and the General Practice Assessment Questionnaire (GPAQ) in Britain [9]. The PCAT has been translated into Castilian (Spanish) and Catalan versions [10] as well as a Brazilian (Portuguese) version [11]. A Puerto Rican (Spanish) version of the PCAT is currently being developed [12].

In South Korea (hereafter referred to as 'Korea'), where the National Health Insurance system covers only over 60% of health care expenditures and 90% of health care organizations belong to the private sector, the terms 'primary care' and 'family medicine' have been used interchangeably since the introduction of family practice in 1985. However, many have raised questions about the role and characteristics of family medicine. A 2006 survey conducted by the Korean Medical Association found that only 7.9% of all clinic-based practitioners were family physicians. In addition, all medical doctors can own a private clinic and practice as a first-contact (FC) medical doctor, regardless of their specialty. The conceptual ambiguity regarding primary care remains painfully evident in Korea [13]. Fortunately, the Korean definition of primary care was recently established using the Delphi method and published in a recent report [14]. Conceptually, it contains four core attributes: FC, comprehensiveness, coordination of care and longitudinality, and three ancillary attributes: personalized care, context of family and community, and community-based care. Under the conceptual framework of this definition, the authors tried to develop a tool for assessing the performance of primary care services from the patient's perspective, and we examined the performance of this tool using a questionnaire-type survey.

## Methods

This study was approved by the Institutional Review Board of Kangnam St. Mary's Hospital, the Catholic University of Korea.

### Item selection

The authors reviewed 190 items that were addressed in previous studies pertaining to primary care assessment [5–8, 15,

16]. Multiple items were developed for each domain and then evaluated from several aspects. Any item that was exceptionally long, lacked clarity, had questionable relevance or had undesirable similarity to other items was either rewritten or eliminated. In addition, the wording of the items was made as simple as possible to ensure that the vast majority of the patients in the sample could fully comprehend the items. All items were written at or below a middle school reading level.

### Response format and scoring method

The items have a 5-point Likert-type response format, ranging from 1 (strongly disagree) to 5 (strongly agree), with neutral as the center option. A 5-point Likert scale response format was selected after considering the patient's ability to discriminate between the response levels and acknowledging that fewer categories reduce the burden of the task for the respondents. An additional 'don't know' option was included for respondents who wished to answer in this manner, and it was interpreted and regarded as 'neutral option = 3'. To make the results easier to understand, all scale scores were reduced by a factor of 1 and multiplied by 25 so that they would fall in the range of 0–100 points, with higher scores indicating more favorable performance.

### Content validity and pilot test

Three diverse groups of skilled experts in primary care (three primary care physicians, three health policy researchers and three family medicine professors) were asked to evaluate the content validity of the items comprising the preliminary tool. They evaluated the relevance of the items in each of the seven domains (four core and three ancillary) and sought to measure and assess the clarity and conciseness of each item. Revisions were made based on group discussions and specific comments made before the validation survey. Pilot tests of the preliminary tool were conducted at three different sites. A total of 36 patients visiting three family physicians completed the pilot survey. Several revisions were made to the wording of the items based on comments made by the patients. The primary goal of the pilot testing was to focus on the wording, comprehensibility and content of the items. The preliminary tool used in the survey contained 30 items, but expert opinions from two seminars held after the survey led the authors to consider reducing the number of items from 30 to 25 because five of the items were deemed inappropriate and/or unrealistic for application in the Korean health care system.

### Sampling and survey for development and validation of the Korean primary care assessment tool

Because it is very difficult to collect representative national data on primary care in Korea, the authors regarded family physicians as the study population from which to obtain homogenous data and we tried to gather data on primary care provided exclusively by family physicians.

**Provider selection.** The distribution of family physicians by clinic structure based on survey data published by the Korean Medical Association (2005) was as follows: community private clinic of 83.4%, hospital family medicine clinic of 13.0% and public health center clinic of 3.6%. There were a total of 16 sampling sites. They were selected because they were recommended by the authors as ordinary primary care providers and agreed to participate in this survey. Eight clinics were located in small provincial cities, whereas the other eight clinics were located in the metropolitan city of Seoul. Only providers who had been practicing at the same clinic for at least 2 years were allowed to participate in this study. All of the providers were family physicians ( $n = 21$ ; M/F = 13/8) who worked in primary care settings and volunteered to participate in this study.

**User selection.** The patient sample consisted of patients (or guardians) who visited one of the participating clinics and agreed to complete the questionnaire before seeing their physicians. Eligible participants were individuals for whom the clinic served as their usual source of care. The usual source of care was defined as a provider whom the user had visited at least six times over a period of more than 6 months.

**Data collection.** Data collection began in April 2007 and lasted for 3 months. Four research assistants, who were trained in interactive interviewing techniques by two of the authors, helped the patients (or guardians) complete the questionnaire in the waiting room of each physician's office. Parents or guardians were allowed to complete the questionnaire on behalf of patients who were less than 18 years of age or disabled.

## Analyses

Principal component analysis was used to explore the structure of the Korean primary care assessment tool (KPCAT) items and examine its construct validity by determining whether the items fell into the hypothesized scales. Internally consistent factors with eigenvalues  $>1$  after rotation were subjected to interpretation. Four criteria were used to eliminate items and determine the final factors [8, 17, 18]. Factor loadings  $>0.35$  were considered meaningful and used as criteria for item retention. In addition, only factors containing at least three items with loadings  $>0.35$  were retained. All retained items should share the same conceptual meaning or construct. Furthermore, none of the retained items should have secondary loadings  $>0.35$ . The Likert scaling assumptions [19] were tested as follows: (i) item-convergent validity, (ii) item-discriminant validity, (iii) equal item-scale correlation and (iv) score reliability tested by Cronbach's coefficient alpha. Descriptive statistics were performed to determine the mean, standard deviation, range, etc. Because respondents who had never seen a specialist did not answer the two coordination questions, the analyses were performed with only one question (*Does your doctor recommend health care resources appropriately?*).

## Results

Among those who had a regular health care provider and were eligible to participate in this survey ( $n = 871$ ), there were no significant differences between the participants ( $n = 734$ , 84.3%) and non-participants ( $n = 137$ , 15.7%) in terms of age and sex. The most common reason for refusing to complete the questionnaire was that the patient was too busy. After excluding samples with more than three missing responses ( $n = 12$ ), a total of 722 effective samples were used for the analysis.

Table 1 shows the socio-demographic features of the survey participants by sex. The average age of the participants was 50.2 years. There were no significant differences in the distributions of age groups and clinic types by sex. However, the male participants reported having a higher income, more years of education, a shorter relationship with their physician and more disease diagnoses than their female counterparts.

### Principal component analysis

Twenty-five items were analyzed in the initial principal component analysis. When the eigenvalue was  $>1.0$ , six components that corresponded to the hypothesized attributes of primary care remained. Four criteria were used to reach the final solution based on the results of principal component analysis. Three items were eliminated because their secondary loadings were  $>0.35$ . In addition, one item was eliminated because its factor loading was  $<0.35$  (*Does your doctor share enough information with you about your health problems and address your concerns?*). Only one of the three preliminary items in the 'longitudinality' domain remained (*Do you get periodic health examinations by your physician?*), and it was included in the 'comprehensiveness' domain by principal component analysis. Finally, a 21-item questionnaire was constructed and named the Korean primary care assessment tool, version 1 (KPCAT, v. 1).

### One composite domain

The 'FC' domain could not be assessed using a traditional scale with multiple correlated items. The Pearson correlation coefficients among the items comprising this domain were so low (0.06–0.24) that each item could be regarded as an independent scale. Therefore, the 'FC' domain was thought to be a composite domain consisting of the following five independent single-item subscales: FC utilization, facility accessibility, cost appropriateness, demographic accessibility, and basic health care (Table 2).

### Testing the Likert scaling assumptions

Table 3 shows a summary of the results of the tests of Likert scaling assumptions using the four multi-item scales. All of the item-scale correlations well exceeded the accepted minimum (0.30), with the majority achieving a correlation of  $>0.50$ . Three of the four multi-item scales achieved 100%

**Table 1** Socio-demographic characteristics of subjects included in the sample

|                                      | Total 722 (100) | Male (%) 279 (38.6) | Female (%) 443 (61.4) | P                 |
|--------------------------------------|-----------------|---------------------|-----------------------|-------------------|
| Age (year)                           | 50.2 SD 20.3    |                     |                       |                   |
| <40                                  | 196 (27.2)      | 74 (26.5)           | 122 (27.5)            | 0.78              |
| 40–64                                | 336 (46.5)      | 136 (48.8)          | 200 (45.2)            |                   |
| ≥65                                  | 190 (26.3)      | 69 (24.7)           | 121 (27.3)            |                   |
| Clinic types by structure            |                 |                     |                       |                   |
| Community Private clinic             | 602 (83.4)      | 226 (81.0)          | 376 (84.9)            | 0.31 <sup>a</sup> |
| Hospital Family Medicine clinic      | 94 (13.0)       | 40 (14.3)           | 54 (12.2)             |                   |
| Public Health Center clinic          | 26 (3.6)        | 13 (4.7)            | 13 (2.9)              |                   |
| Income (million Won/month/household) | 260.6 SD 215.0  |                     |                       |                   |
| <1.50                                | 210 (30.7)      | 78 (28.0)           | 169 (38.2)            | 0.003             |
| 1.50–2.99                            | 206 (28.5)      | 85 (30.5)           | 85 (27.3)             |                   |
| ≥3.00                                | 269 (37.3)      | 116 (41.6)          | 116 (34.5)            |                   |
| Missing                              | 37              |                     |                       |                   |
| Education (year)                     | 9.8 SD 5.4      |                     |                       |                   |
| <10                                  | 310 (44.0)      | 100 (36.6)          | 210 (48.6)            | 0.001             |
| 10–12                                | 194 (27.5)      | 78 (28.6)           | 116 (26.9)            |                   |
| ≥13                                  | 201 (28.5)      | 95 (34.8)           | 106 (24.5)            |                   |
| Missing                              | 17              |                     |                       |                   |
| Duration since first visit (year)    | 4.1 SD 2.2      |                     |                       |                   |
| <3                                   | 227 (31.4)      | 99 (35.5)           | 128 (28.9)            | 0.052             |
| 3–5                                  | 273 (37.8)      | 103 (36.9)          | 170 (38.4)            |                   |
| ≥6                                   | 222 (30.8)      | 77 (27.6)           | 145 (32.7)            |                   |
| Number of diseases                   | 1.0 SD 0.8      |                     |                       |                   |
| 0                                    | 205 (28.4)      | 61 (21.9)           | 144 (32.5)            | 0.043             |
| 1                                    | 345 (47.9)      | 150 (53.9)          | 195 (44.0)            |                   |
| 2 or more                            | 171 (23.7)      | 67 (24.1)           | 104 (23.5)            |                   |
| Missing                              | 1               |                     |                       |                   |

Mantel-Haenszel chi-square test.

<sup>a</sup>Chi-square test.

scaling success, indicating that almost all of the items in these scales showed a substantially greater correlation with items in their hypothesized scale than with items in other scales. As shown in column 1 (range of item-scale correlations), the range is relatively narrow (from 0.13 for ‘family/community orientation’ to 0.21 for ‘comprehensiveness’). Finally, analysis of score reliability showed that, with the exception of the ‘comprehensiveness’ domain ( $\alpha = 0.69$ ), all alpha levels exceeded 0.70 and were sufficiently high.

### Descriptive Feature of the KPCAT

The full range of possible scores was observed for all scales, except for the ‘personalized care’ and ‘FC’ domains. Of the five domains of the KPCAT, v. 1, ‘FC’ and ‘personalized care’ had the highest domain scores (Table 4). The elderly participants (≥65 years) tended to give the ‘coordination function’ domain and the ‘facility accessibility’ and ‘cost appropriateness’ subscales lower ratings than the subjects in other age groups. The female subjects’ ratings of the ‘comprehensiveness’ and ‘family/community orientation’ domains were worse than those of their male counterparts. In addition, the

subjects with a middle school education or lower, tended to give ‘comprehensiveness’, ‘coordination function’ and ‘total primary care score’ lower ratings than those with more years of education. People of low socioeconomic status whose monthly household income was less than 1.5 million Won (₩) gave their usual source of care the worst ratings on the ‘coordination function’ domain and on the ‘facility accessibility’ and ‘cost appropriateness’ subscales of the ‘FC’ domain. However, they gave their usual source of care the best ratings on the ‘personalized care’ domain. Patients with a long-term relationship with their usual source of care (≥6 years) gave their primary care physician the best ratings on all domains of primary care, except for the ‘FC’ domain (Table 5).

### Discussion

Previous studies have shown the value of measuring primary care in multi-dimensional terms that parallel its formal definition, and they have highlighted the fallibility of relying on unidimensional proxies for primary care (such as the provider’s disciplinary affiliation) [20, 21]. Our research showed

**Table 2** Principal component analysis<sup>a</sup> and item reduction process used to develop the KPCAT<sup>b</sup>

| Primary care attributes | Items contained in preliminary tool                                                           | Missing   | 'Don't know'/<br>Not applicable (%) | Factor<br>loading<br>(component) | Comments                                         |
|-------------------------|-----------------------------------------------------------------------------------------------|-----------|-------------------------------------|----------------------------------|--------------------------------------------------|
| FC                      | Do you visit this clinic first when a new health problem arises?                              | 0         | 4 (0.6)                             | 0.67 (5)                         | FC utilization                                   |
|                         | Is it easy for you to access this facility?                                                   | 1         | 5 (0.7)                             | 0.61 (5)                         | Facility accessibility                           |
|                         | Appropriateness of out-of-pocket cost?                                                        | 0         | 71 (9.8)                            | 0.62 (6)                         | Cost appropriateness                             |
| Comprehensiveness       | Your doctor sees patients regardless of their age and sex?                                    | 0         | 25 (3.5)                            | 0.65 (6)                         | Demographic accessibility                        |
|                         | Basic health care available?                                                                  | 1         | 57 (7.9)                            | 0.48 (5)                         | Basic health care                                |
|                         | Does your doctor treat mental health problems as well as physical health problems?            | 0         | 53 (7.3)                            | 0.62 (1)                         | Personalized care                                |
|                         | Counseling/education for health lifestyle                                                     | (Deleted) |                                     |                                  | Loading on components 2 and 3                    |
|                         | Medical check-up available? (e.g. physical exam, blood sugar, cholesterol, BP controls, etc.) | 0         | 64 (8.9)                            | 0.59 (3)                         | Comprehensiveness (four items)                   |
|                         | Counsels for cancer prevention and screening?                                                 | 0         | 205 (28.4)                          | 0.69 (3)                         |                                                  |
|                         | You (or your family member) get periodic Pap smear tests from your physician?                 | 0         | 352 (48.8)                          | 0.75 (3)                         |                                                  |
| Longitudinality         | Periodic health examination by your physician?                                                | 1         | 108 (15.0)                          | 0.70 (3)                         |                                                  |
|                         | Is the medical team identical whenever you visit this clinic?                                 | (Deleted) |                                     |                                  | Loading on components 1 and 5                    |
| Coordination            | Does your doctor recommend health care resources appropriately?                               | 0         | 131 (18.1)                          | 0.66 (2)                         | Coordination function <sup>b</sup> (three items) |
|                         | Since your doctor started treating you, have you ever visited a specialist?                   |           |                                     |                                  |                                                  |
|                         | a. If yes, did your doctor recommend the specialist?                                          | 337       | 51 (13.3)                           | 0.84 (2)                         |                                                  |
|                         | b. If yes, did your doctor review the referral results?                                       | 358       | 76 (20.9)                           | 0.84 (2)                         |                                                  |

(continued)



Table 2 Continued

| Primary care attributes         | Items contained in preliminary tool                                                               | Missing   | 'Don't know'/<br>Not applicable (%) | Factor<br>loading<br>(component) | Comments                                  |
|---------------------------------|---------------------------------------------------------------------------------------------------|-----------|-------------------------------------|----------------------------------|-------------------------------------------|
| Personalized care               | Doctor understands patients' words easily?                                                        | 7         | 3 (0.4)                             | 0.76 (1)                         | Personalized care (five items)            |
|                                 | Doctor explains test results in a manner that is easy for patients to understand?                 | 0         | 5 (0.7)                             | 0.79 (1)                         |                                           |
|                                 | Doctor recognizes the importance of the patient's medical history?                                | 0         | 51 (7.1)                            | 0.66 (1)                         | Loading <0.35 on component 2              |
|                                 | Trust your doctor's decisions on treatment?                                                       | 0         | 9 (1.3)                             | 0.72 (1)                         |                                           |
|                                 | Doctor shares enough information with you about your health problems and addresses your concerns? | (Deleted) |                                     |                                  |                                           |
| Context of family and community | Doctor asks about and considers the medical history or health states of your family members?      | (Deleted) |                                     |                                  | Loading on components 2 and 6             |
|                                 | Doctor knows about the health, well-being and environmental problems of your community?           | 0         | 272 (37.7)                          | 0.61 (4)                         | Family/community orientation (four items) |
|                                 | Doctor has a concern about the persons living with you?                                           | 0         | 112 (15.5)                          | 0.45 (4)                         |                                           |
| Community Base                  | Is the doctor active in promoting the health of your community?                                   | 3         | 472 (65.7)                          | 0.83 (4)                         |                                           |
|                                 | This clinic surveys and reflects people's opinions on health care?                                | 1         | 364 (50.5)                          | 0.74 (4)                         |                                           |

<sup>a</sup>By orthogonal Varimax rotation (eigenvalue  $\geq 1.0$ , factor loading  $>0.35$ ); <sup>b</sup>Korean Primary Care Assessment Tool.

**Table 3** Five domains of the KPCAT, v. 1 and Likert scale assumptions of its four ordinary scales

| Domains                               | No. of items | Item-scale correlation | Discriminant validity         |                          | Cronbach's alpha |
|---------------------------------------|--------------|------------------------|-------------------------------|--------------------------|------------------|
|                                       |              |                        | Item, other scale correlation | Scaling success rate (%) |                  |
| Personalized care                     | 5            | 0.49–0.63              | 0.05–0.41                     | 40/40 (100)              | 0.78             |
| Coordination function                 | 3            | 0.50–0.69              | –0.06–0.40                    | 24/24 (100)              | 0.77             |
| Comprehensiveness                     | 4            | 0.38–0.59              | –0.07–0.42                    | 30/32 (93.8)             | 0.69             |
| Family/community orientation          | 4            | 0.42–0.55              | 0.04–0.38                     | 32/32 (100)              | 0.71             |
| One composite domain: FC <sup>a</sup> |              |                        |                               |                          |                  |

Pearson correlation analysis. <sup>a</sup>One composite domain, FC, consists of score average of five independent subscales.

**Table 4** Descriptive features of the KPCAT, v. 1

| Domains                               | No. of items | No. of patients | Mean | Median | Standard deviation | Score range (observed) |
|---------------------------------------|--------------|-----------------|------|--------|--------------------|------------------------|
| Personalized care                     | 5            | 722             | 90.1 | 95.0   | 11.6               | 40–100                 |
| Coordination function                 | 3            | 722             | 59.9 | 66.7   | 31.5               | 0–100                  |
| Comprehensiveness                     | 4            | 722             | 52.4 | 56.3   | 24.5               | 0–100                  |
| Family/community orientation          | 4            | 722             | 65.0 | 62.5   | 17.1               | 0–100                  |
| FC <sup>a</sup>                       | 5            | 722             | 87.0 | 90.0   | 12.4               | 30–100                 |
| FC utilization                        | 1            | 722             | 88.8 | 100    | 20.0               | 0–100                  |
| Facility accessibility                | 1            | 721             | 90.5 | 100    | 19.5               | 0–100                  |
| Cost appropriateness                  | 1            | 722             | 82.0 | 100    | 23.3               | 0–100                  |
| Demographic accessibility             | 1            | 722             | 96.0 | 100    | 12.3               | 0–100                  |
| Basic health care                     | 1            | 721             | 77.8 | 100    | 30.3               | 0–100                  |
| Total primary care score <sup>b</sup> |              | 722             | 70.9 | 70.5   | 13.5               | 27–100                 |

<sup>a</sup>One composite domain, FC, consists of score average of five independent subscales.

<sup>b</sup>Score average of five domains.

that the seven attributes of the Korean definition of primary care did not directly form the seven comparable domains from the user's point of view. However, an assessment based on the user's experience alone may not be sufficient to measure the entire range of primary care performance. In addition, the KPCAT, v. 1 does not assess the technical aspects of quality of care due to the limitations surrounding user-provided information.

'FC' turned out to be a composite domain with five independent single-item scales in our study. Considering the average score (70.9 SD 13.5) on all five domains, this domain acquired a relatively high score (87.0 SD 12.4), which may be explained not only by the expansion of health care resources and increase in average household income in Korea, but also by the remarkable improvement in the accessibility of the Korean health care system since the introduction of the National Health Insurance (NHI) system in 1989. The NHI insures 97% of the Korean population. The tax-financed Medical Protection Program covers the health care costs for the remaining 3% of the nation's population, which represents the poorest members of society [22]. In Quebec, Canada, by contrast, FC accessibility of primary care clinics

showed the most problematic among three attributes (accessibility, continuity and coordination), in a survey (2002) using the PCAT [23]. 'Comprehensiveness' has rarely been evaluated from the patient's perspective [24]. A previous study showed that patients generally have limited knowledge about the range of services provided by family physicians [25]. In our study, 'comprehensiveness' was evaluated using only a four-item scale. In this domain, the scaling success rate was not 100% and the Cronbach's alpha value was not over 0.70. More items might have been necessary to sufficiently evaluate this domain.

Longer durations of the doctor–patient relationship correlate with a higher degree of patient satisfaction. For example, patients in 133 Norwegian general practice clinics who had a relationship with their primary care physician for more than 5 years were over one-third more likely to report being very satisfied with the quality of care than those with patient–doctor relationships lasting 1–5 years [26]. However, it is possible to have a poor long-term relationship and it is possible for a good relationship to develop over a short period of time. Thus, it seems more reasonable and appropriate to assess the strength of the interpersonal linkage

**Table 5** Primary care scores on 5 domains of the KPCAT, v. 1 by demographic variables

| Variables                            | Domains           |                   |                   |                   |                 | Five independent subscales of FC composite domain |                   |                   |      |                   | Total primary care score |
|--------------------------------------|-------------------|-------------------|-------------------|-------------------|-----------------|---------------------------------------------------|-------------------|-------------------|------|-------------------|--------------------------|
|                                      | PC                | CF                | CH                | FCO               | FC <sup>a</sup> | FCU                                               | FA                | CA                | DA   | BHC               |                          |
| Age (years)                          |                   |                   |                   |                   |                 |                                                   |                   |                   |      |                   |                          |
| < 40 ( <i>n</i> = 196)               | 87.7 <sup>b</sup> | 67.2 <sup>b</sup> | 49.0 <sup>c</sup> | 65.2              | 88.6            | 87.6                                              | 91.8 <sup>b</sup> | 85.8 <sup>c</sup> | 96.6 | 81.1              | 71.5                     |
| 40–64 ( <i>n</i> = 336)              | 89.6              | 59.7              | 54.6              | 64.7              | 86.7            | 88.0                                              | 92.0              | 81.3              | 95.8 | 76.4              | 71.0                     |
| ≥ 65 ( <i>n</i> = 190)               | 93.4              | 52.5              | 52.1              | 65.3              | 85.8            | 91.1                                              | 86.2              | 79.3              | 96.1 | 76.2              | 69.8                     |
| Sex                                  |                   |                   |                   |                   |                 |                                                   |                   |                   |      |                   |                          |
| Male ( <i>n</i> = 279)               | 89.1              | 57.1              | 52.5 <sup>c</sup> | 64.8 <sup>c</sup> | 85.4            | 86.2                                              | 87.7              | 80.5              | 93.7 | 74.1              | 70.4                     |
| Female ( <i>n</i> = 443)             | 88.9              | 56.3              | 48.2              | 62.3              | 85.9            | 86.9                                              | 88.9              | 79.1              | 95.5 | 74.8              | 68.9                     |
| Education (years)                    |                   |                   |                   |                   |                 |                                                   |                   |                   |      |                   |                          |
| < 10 ( <i>n</i> = 310)               | 90.9              | 51.3 <sup>b</sup> | 48.4 <sup>b</sup> | 64.3              | 86.8            | 89.7                                              | 90.0              | 80.2              | 96.5 | 77.5              | 68.3 <sup>b</sup>        |
| 10–12 ( <i>n</i> = 194)              | 90.2              | 64.0              | 56.0              | 66.3              | 87.0            | 87.0                                              | 91.1              | 82.7              | 96.4 | 77.7              | 72.7                     |
| ≥ 13( <i>n</i> = 201)                | 88.6              | 68.2              | 54.9              | 64.6              | 87.7            | 89.1                                              | 91.6              | 84.1              | 95.6 | 78.1              | 72.8                     |
| Income (million Won/month/household) |                   |                   |                   |                   |                 |                                                   |                   |                   |      |                   |                          |
| < 1.5 ( <i>n</i> = 210)              | 92.8 <sup>b</sup> | 50.9 <sup>b</sup> | 51.5              | 65.5              | 86.3            | 90.5                                              | 88.3 <sup>c</sup> | 77.1 <sup>b</sup> | 96.1 | 79.4              | 69.4                     |
| 1.5–2.9 ( <i>n</i> = 206)            | 88.9              | 61.1              | 55.7              | 64.2              | 89.0            | 89.4                                              | 89.3              | 85.0              | 96.0 | 75.5              | 71.4                     |
| ≥ 3.0 ( <i>n</i> = 268)              | 88.7              | 64.6              | 50.6              | 64.8              | 89.9            | 87.1                                              | 93                | 83.8              | 96.7 | 78.7              | 71.3                     |
| Duration since first-visit (year)    |                   |                   |                   |                   |                 |                                                   |                   |                   |      |                   |                          |
| < 3 ( <i>n</i> = 227)                | 88.6 <sup>b</sup> | 53.7 <sup>b</sup> | 51.2 <sup>b</sup> | 65.2 <sup>c</sup> | 87.2            | 87.3 <sup>c</sup>                                 | 92.3 <sup>c</sup> | 82.8              | 94.9 | 78.5 <sup>b</sup> | 69.2 <sup>b</sup>        |
| 3–5 ( <i>n</i> = 273)                | 89.7              | 58.3              | 47.6              | 62.9              | 86.0            | 87.5                                              | 91.4              | 81.6              | 96.6 | 72.9              | 68.9                     |
| ≥ 6 ( <i>n</i> = 222)                | 92.1              | 68.0              | 59.5              | 67.3              | 88.0            | 91.7                                              | 87.4              | 81.8              | 96.5 | 82.6              | 75.0                     |
| Number of disease                    |                   |                   |                   |                   |                 |                                                   |                   |                   |      |                   |                          |
| 0 (n = 205)                          | 87.6 <sup>b</sup> | 63.9              | 48.0 <sup>b</sup> | 64.2              | 88.3            | 87.4                                              | 94.7              | 84.1              | 96.1 | 78.9              | 70.4                     |
| 1 ( <i>n</i> = 344)                  | 90.8              | 57.0 <sup>c</sup> | 52.5              | 65.7              | 86.9            | 89.2                                              | 90.3              | 82.0              | 96.2 | 77.1              | 70.6                     |
| 2 or more ( <i>n</i> = 171)          | 91.7              | 60.5              | 57.5              | 64.5              | 85.6            | 89.6                                              | 85.7 <sup>b</sup> | 79.5              | 95.8 | 77.2              | 71.9                     |

ANOVA, Student *t*-test and Kruskal–Wallis test.

PC, personalized care; CF, coordination function; CH, comprehensiveness; FCO, family/community orientation; FCU, first contact utilization; FA, facility accessibility; CA, cost appropriateness; DA, demographic accessibility; BHC, basic health care.

<sup>a</sup>Composite scale consists of score average of five independent subscales. <sup>b</sup> $P < 0.01$ ; <sup>c</sup> $0.01 \leq P < 0.05$ .

between people and their health care providers [27]. In our study, there was a significant difference between patients who had had a relationship with their doctor for more than 5 years and those who had 1–5-year relationships with their physicians in the ‘personalized care’ domain, which is comparable to the longitudinality subdomain of ‘interpersonal relationships’ of the PCAT.

This study has several potential limitations. First, assessment of primary care practices based on user experience is only one aspect of primary care evaluation. If providers were to assess the performance of primary care, the results may have different features. Second, a previous study reported that users with a regular source of care were likely to evaluate their provider’s level of performance as being very high or favorable [28], and this tendency may be even higher in Korea, where only 30% of adults have a regular health care provider [29]. Third, the items with relatively high rates of ‘don’t know’ responses (e.g. >30%) may have low sensitivity for evaluating the performance that the item represented (e.g. items on Pap smear, community context, etc.). Fourth, this study was confined to a sample of patients who visited family physicians, and the results may not be sufficient to

represent primary care as a whole in Korea. Fifth, it may be more appropriate to represent some ‘scales’ as ‘indexes’ (a sum of the scores) rather than averages, particularly the domains related to accessibility. In addition, the scale, ‘FC,’ was established based on an arbitrary decision made by the authors rather than statistical evidence.

In conclusion, the KPCAT, which was designed to comprehensively assess primary care practices from the patient’s perspective, appears to measure important features of primary care performance, even though all scales are not sound enough to show good psychometric properties of the KPCAT, v. 1. The results of our study will provide valuable information about primary care practices in Korea. The next phase of the study will be to identify the characteristics of providers and health care organizations that account for the observed differences in primary care performance.

## Acknowledgments

We are indebted to Stephen J. Spann, MD, MBA and Robert J. Volk, PhD of Baylor College of Medicine for their



contribution to the initial planning of this project and their final reviews of the manuscript. We are grateful and appreciative to Professor Barbara Starfield of Johns Hopkins University for his helpful comments on a later draft of this manuscript. This project was supported in part by the Academic Award from the Korean Academy of Family Medicine (2005).

## References

- Starfield B, Shi L, Macinko J. Contribution of primary care to health systems and health. *Milbank Q* 2005;**83**:457–502.
- Starfield B. *Primary Care: Concept, Evaluation, and Policy*. New York: Oxford University Press, 1992.
- Saltman RB. Drawing the strands together: primary care in perspective. In: Saltman B, Rico A, Boerma W (eds). *Primary Care in the Driver's Seat?* Berkshire, UK: Open University Press, 2006.
- Donaldson JS, Yordy KD, Lohr KN (eds). *Primary Care: America's Health in a New Era*. Washington, DC: National Academy Press, 1996, 13–51.
- Flocke SA. Measuring attributes of primary care: development of a new instrument. *J Fam Pract* 1997;**45**:64–74.
- Safran DG, Kosinske M, Tarlov AR *et al*. The Primary Care Assessment Survey: tests of data quality and measurement performance. *Medical Care* 1998;**36**:728–39.
- Casady CE, Starfield B, Hurtado MP *et al*. Measuring consumer experiences with primary care. *Pediatrics* 2000;**105**: 998–1003.
- Shi L, Starfield B, Xu J. Validating the Adult Primary Care Assessment Tool. *J Fam Pract* 2001;**50**:161.
- Mead N, Bower P, Roland M. The General Practice Assessment Questionnaire (GPAQ) – development and psychometric characteristics. *BMC Fam Pract* [serial online] 2008;**9**:13. <http://www.biomedcentral.com/1471-2296/9/13> (20 February 2009, date last accessed).
- Pasarin MI, Berra S, Rajmil L *et al*. [An instrument to evaluate primary health care from the population perspective] (in Spanish). *Aten Primaria* 2007;**39**:395–401.
- Harzheim E, Duncan BB, Stein AT *et al*. Quality and effectiveness of different approaches to primary care delivery in Brazil. *BMC Health Serv Res* [serial online] 2006;**6**:156. <http://www.biomedcentral.com/1472-6963/6/156> (20 February 2009, date last accessed).
- Puerto Rico Health Services Research Institute. *Development of a Spanish Version of the Primary Care Assessment Tool (PCAT)*. <http://prhsri.rcm.upr.edu/recentpro.html> (2 June 2008, date last accessed).
- Kim CY. Primary care in Korea: mirage or reality. *Korean J Public Health* 2000;**37**:25–35.
- Lee JH, Choi YJ, Volk RJ *et al*. Defining the concept of primary care in South Korea using a delphi method. *Fam Med* 2007;**39**:425–31.
- Lee MS. Preliminary study of the evaluation scheme of primary care roles of primary health care centers (in Korean). *J Korean Public Health Assoc* 1986;**12**:59–76.
- Shim JY, Lee HR, Chung ES *et al*. A study on the development of a questionnaire to assess the quality of care in family practice; from the aspects of continuity, comprehensiveness and personal relationship (in Korean). *J Korean Acad Fam Med* 1995;**16**:674–83.
- Norman GR, Streiner DL. *Biostatistics: The Bare Essentials*. St. Louis, Mo: Mosby, 1994.
- Hatcher L. *A Step-By-Step Approach to Using the Sas System for Factor Analysis and Structural Equation Modeling*. Cary, NC: SAS Institute, 1994, 57–127.
- Likert R. A technique for the measurement of attitudes. *Arch Psychol* 1932;**140**:1.
- Smith WG, Buesching D. Measures of primary medical care and patient characteristics. *J Ambul Care Manage* 1986;**9**:49–57.
- Safran DG, Tarlov AR, Rogers WH. Primary care performances in fee-for-service and prepaid health care systems: Results from the Medical Outcomes Study. *JAMA* 1994;**271**:1579–86.
- Yang BM, Bae EY, Kim JH. Economic evaluation and pharmaceutical reimbursement reform in South Korea's National Health Insurance. *Health Aff* 2008;**27**:179–87.
- Haggerty JL, Pineault R, Beaulieu MD *et al*. Practice features associated with patient-reported accessibility, continuity, and coordination of primary health care. *Ann Fam Med* 2008;**6**:116–23.
- Bindman AB, Grumbach K, Osmond D *et al*. Primary care and receipt of preventive services. *J Gen Intern Med* 1996;**11**:269–76.
- Farnum E, Flynn S, Hazey J. Family practice: a well kept secret or not? *Paper Presented at the Ohio Academy Of Physicians Annual Research Day*, Cleveland, Ohio, 1993.
- Hjortdahl P, Laerum E. Continuity of care in general practice: effect on patient satisfaction. *BMJ* 1992;**304**:1287–90.
- Starfield B. *Primary care: balancing health needs, services, and technology*. New York: Oxford University Press, 1998.
- Rodriguez HP, von Glahn T, Chang H *et al*. Patient samples for measuring primary care physician performance. Who should be included? *Med Care* 2007;**45**:989–96.
- Kim JH, Cho HJ. Effects of having regular source of care on preventive services and disease control (in Korean). *J Korean Acad Fam Med* 2007;**28**:278–85.

Accepted for publication 1 February 2009
